CORRECTION

# Correction: Characteristics of astigmatism before and 1 month after blepharoptosis surgery in patients with acquired ptosis

Kazuhiko Dannoue, Seiji Takagi, Keiko Uemura, Anna Takei, Tomohiko Usui

In [Table 1](#), the value in “Number of eyes” under “AP” column and the category name “MRD (mm)” and its values are incorrect. It should have been “84” and “MRD-1 (mm)” respectively. Please see the correct [Table 1](#) here.

In [Table 2](#), there are errors in the “Postoperative (cases/%)” group of contact lens-related ptosis (CLP). Please see the correct [Table 2](#) here.

[Fig 1](#) is incorrect. Please see the correct [Fig 1](#) here.

In the Abstract section, there is an error in the seventh, tenth, eleventh and fifteenth sentences. The correct seventh sentence is: The correlation between SIA and margin reflex distance (MRD-1) was calculated. The correct tenth sentence is: The MRD-1 increased significantly after treatment in both groups. The correct eleventh sentence is: The proportions of WTR, ATR, and OA were 22%, 52%, and 25%, and 86%, 9%, and 4% in the AP and CLP groups, respectively. The correct fifteenth sentence is: There was no significant correlation between SIA calculated using the Cravy and Jaffe methods and MRD-1.

In the Patients subsection of Introduction, there is an error in the sixth sentence. The correct sentence is: Ptosis severity was evaluated using the margin reflex distance (MRD-1), a measurement of the distance from the middle upper eyelid to the corneal light reflex [29].

In the Statistical analyses subsection of Patients and Methods, there is an error in the fifth sentence. The correct sentence is: The association among the individual SIA was calculated using the Cravy method, the Jaffe method, and the preoperative MRD-1.

In the Results section, there is an error in the second and fifth sentences of the first paragraph. The correct second sentence is: One hundred and eight eyes from 58 patients (AP group: 84 eyes from 45 patients; females, 32; age,  $73.8 \pm 7.6$  years; CLP group: 23 eyes from 13 patients; females, 10; age,  $47.7 \pm 6.6$  years) were included. The correct fifth sentence is: The MRD-1 increased significantly after treatment in both the AP group ( $0.78 \pm 0.9$  mm to  $3.22 \pm 1.2$  mm;  $P < 0.001$ ) and CLP group ( $0.70 \pm 0.5$  mm to  $3.85 \pm 0.5$  mm;  $P < 0.001$ ).

In the Results section, there is an error in the second paragraph. The correct paragraph is: The proportions of WTR, ATR, and OA were 22%, 52%, and 25% and 86%, 9%, and 4% in the AP and CLP groups, respectively ([Fig 1](#)).

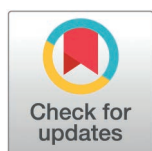

## OPEN ACCESS

**Citation:** Dannoue K, Takagi S, Uemura K, Takei A, Usui T (2025) Correction: Characteristics of astigmatism before and 1 month after blepharoptosis surgery in patients with acquired ptosis. PLoS One 20(11): e0336805. <https://doi.org/10.1371/journal.pone.0336805>

**Published:** November 13, 2025

**Copyright:** © 2025 Dannoue et al. This is an open access article distributed under the terms of the [Creative Commons Attribution License](#), which permits unrestricted use, distribution, and reproduction in any medium, provided the original author and source are credited.

**Table 1. Demographic data of the age-related ptosis (AP) and contact lens-related ptosis (CLP) groups.**

|                        | AP                  |                      |            | CLP                 |                      |            | P-value |
|------------------------|---------------------|----------------------|------------|---------------------|----------------------|------------|---------|
| Number of eyes         | 84                  |                      |            | 23                  |                      |            | —       |
| Age (years)            | 73.8 ± 7.6          |                      |            | 47.7 ± 6.6          |                      |            | <0.01*  |
| Sex (male:female)      | 13:32               |                      |            | 3:10                |                      |            | >0.05** |
|                        | Pre-operative value | Post-operative value | P-value*** | Pre-operative value | Post-operative value | P-value*** | —       |
| MRD-1 (mm)             | 0.78 ± 0.9          | 3.22 ± 1.2           | <0.001     | 0.70 ± 0.5          | 3.85 ± 0.5           | <0.001     | —       |
| Visual acuity (logMar) | 0.05 ± 0.92         | 0.04 ± 0.89          | >0.05      | −0.08 ± 1.00        | −0.08 ± 1.15         | >0.05      | —       |

\*Mann–Whitney U test,

\*\*chi-square test, and

\*\*\*student's t-test

<https://doi.org/10.1371/journal.pone.0336805.t001>

**Table 2. Shift in the type of astigmatism postoperatively in the acquired ptosis (AP) and contact lens-related ptosis (CLP) groups.**

| AP                   |                         | CLP                  |                         |
|----------------------|-------------------------|----------------------|-------------------------|
| Preoperative (cases) | Postoperative (cases/%) | Preoperative (cases) | Postoperative (cases/%) |
| WTR (21)             | WTR (15/71.4)           | WTR (20)             | WTR (19/95.0)           |
|                      | OA (5/23.8)             |                      | OA (0/0)                |
|                      | ATR (1/4.8)             |                      | ATR (1/5.0)             |
| OA (19)              | OA (9/47.3)             | OA (2)               | OA (0/0)                |
|                      | WTR (5/26.3)            |                      | WTR (2/100)             |
|                      | ATR (5/26.3)            |                      | ATR (0)                 |
| ATR (44)             | ATR (25/56.8)           | ATR (1)              | ATR (0)                 |
|                      | OA (14/31.8)            |                      | OA (1/100)              |
|                      | WTR (5/11.3)            |                      | WTR (0)                 |

The shaded cells represent a change in the type of astigmatism postoperatively. WTR: With-the-rule; ATR: Against the rule; OA: Oblique astigmatism.

<https://doi.org/10.1371/journal.pone.0336805.t002>

In the Results section, there is an error in the third and fifth sentences of the third paragraph. The correct third sentence is: WTR changed to OA in 23.8% and ATR in 4.8% of the patients, OA changed to WTR in 26.3% and ATR in 26.3% of the patients, and ATR changed to WTR in 11.3% and OA in 31.8% of the patients. The correct fifth sentence is: WTR changed to ATR in 5.0%, OA changed to WTR in 100%, and ATR changed to OA in 100% of the patients.

In the Discussion section, there is an error in the eighth sentence of the first paragraph. The correct eighth sentence is: WTR was most frequent in the CLP group, while the proportions of WTR and OA were 22% and 25%, respectively, in the AP group.

In the Discussion section, there is an error in the eighth sentence of the third paragraph. The correct eighth sentence is: We observed similar results in terms of the type of astigmatism: 41% of patients in the AP group and 13% of patients in the CLP group showed a change in the type of astigmatism postoperatively (Table 2).

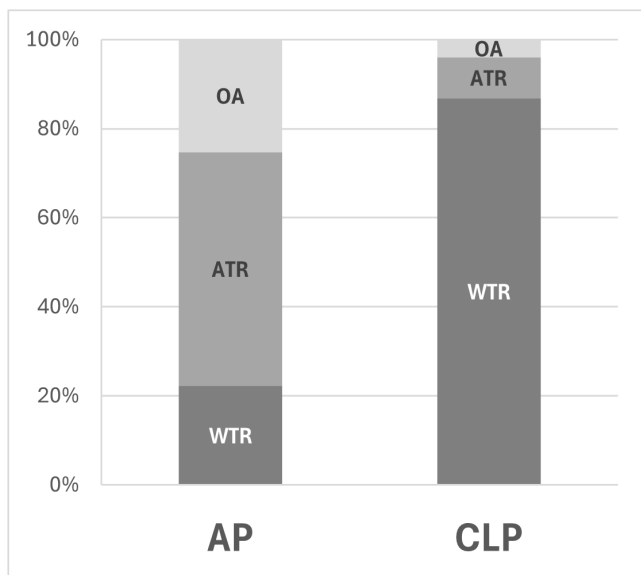

**Fig 1. Proportions of the preoperative astigmatism type in the acquired ptosis (AP) and contact lens-related ptosis (CLP) groups.** WTR: With-the-rule; ATR: Against the rule; OA: Oblique astigmatism.

<https://doi.org/10.1371/journal.pone.0336805.g001>

## Reference

1. Dannoue K, Takagi S, Uemura K, Takei A, Usui T. Characteristics of astigmatism before and 1 month after blepharoptosis surgery in patients with acquired ptosis. PLoS One. 2021;16(10):e0258688. <https://doi.org/10.1371/journal.pone.0258688> PMID: [34710107](https://pubmed.ncbi.nlm.nih.gov/34710107/)
